# Supplementary material for: Modulated Start-Up Mode of Cancer Cell Migration Through Spinophilin-Tubular Networks
Source: Frontiers journal article supplement (doi:10.3389/fcell.2021.652791), 2021-03-09
Supplement: Data_Sheet_1.pdf [file Data_Sheet_1.pdf]

# Modulated start-up mode of cancer cell migration through spinophilin-tubular networks

Soyoung Hwang<sup>1</sup>, Peter Chang-Whan Lee<sup>2</sup>, Dong Min Shin<sup>3†</sup>, and Jeong Hee Hong<sup>1,4†</sup>

Department of Physiology, College of Medicine, Department of Health Sciences and Technology, GAIHST, Gachon University, 155 Getbeolro, Yeonsu-gu, Incheon, 21999, South Korea

**Running title:** Spinophilin modulates cell migration

**Key words:** spinophilin, migration, tight junction, tubular network, bicarbonate transporter

<sup>†</sup> Correspondence to JHH ([minicleo@gachon.ac.kr](mailto:minicleo@gachon.ac.kr)) and DMS ([dmshin@yuhs.ac](mailto:dmshin@yuhs.ac))

## Authors:

### Soyoung Hwang

<sup>1</sup>Department of Physiology, College of Medicine, Gachon University, 155 Getbeolro, Yeonsu-gu, Incheon, 21999, South Korea

Phone: +82-32-899-6434

E-mail: [snrntlwy1004@gmail.com](mailto:snrntlwy1004@gmail.com)

### Peter Chang-Whan Lee

<sup>2</sup>Department of Biomedical Sciences, University of Ulsan College of Medicine, Asan Medical Center, Seoul 05505, Korea.

Phone: +82-2-3010-2799

E-mail: [pclee@amc.seoul.kr](mailto:pclee@amc.seoul.kr)

### <sup>†</sup>Dong Min Shin

<sup>3</sup>Department of Oral Biology, Yonsei University College of Dentistry, Seoul 03722, Republic of Korea

Phone: +82-2-2228-3051

E-mail: [dmshin@yuhs.ac](mailto:dmshin@yuhs.ac)

### <sup>†</sup>Jeong Hee Hong, PhD,

<sup>1</sup>Department of Physiology, College of Medicine, Gachon University, 155 Getbeolro, Yeonsu-gu, Incheon, 21999, South Korea

<sup>4</sup>Department of Health Sciences and Technology, GAIHST, Lee Gil Ya Cancer and Diabetes Institute, 155 Getbeolro, Yeonsu-gu, Incheon, 21999, South Korea

Phone: +82-32-899-6682

Fax: +82-32-899-6039

E-mail: [minicleo@gachon.ac.kr](mailto:minicleo@gachon.ac.kr)

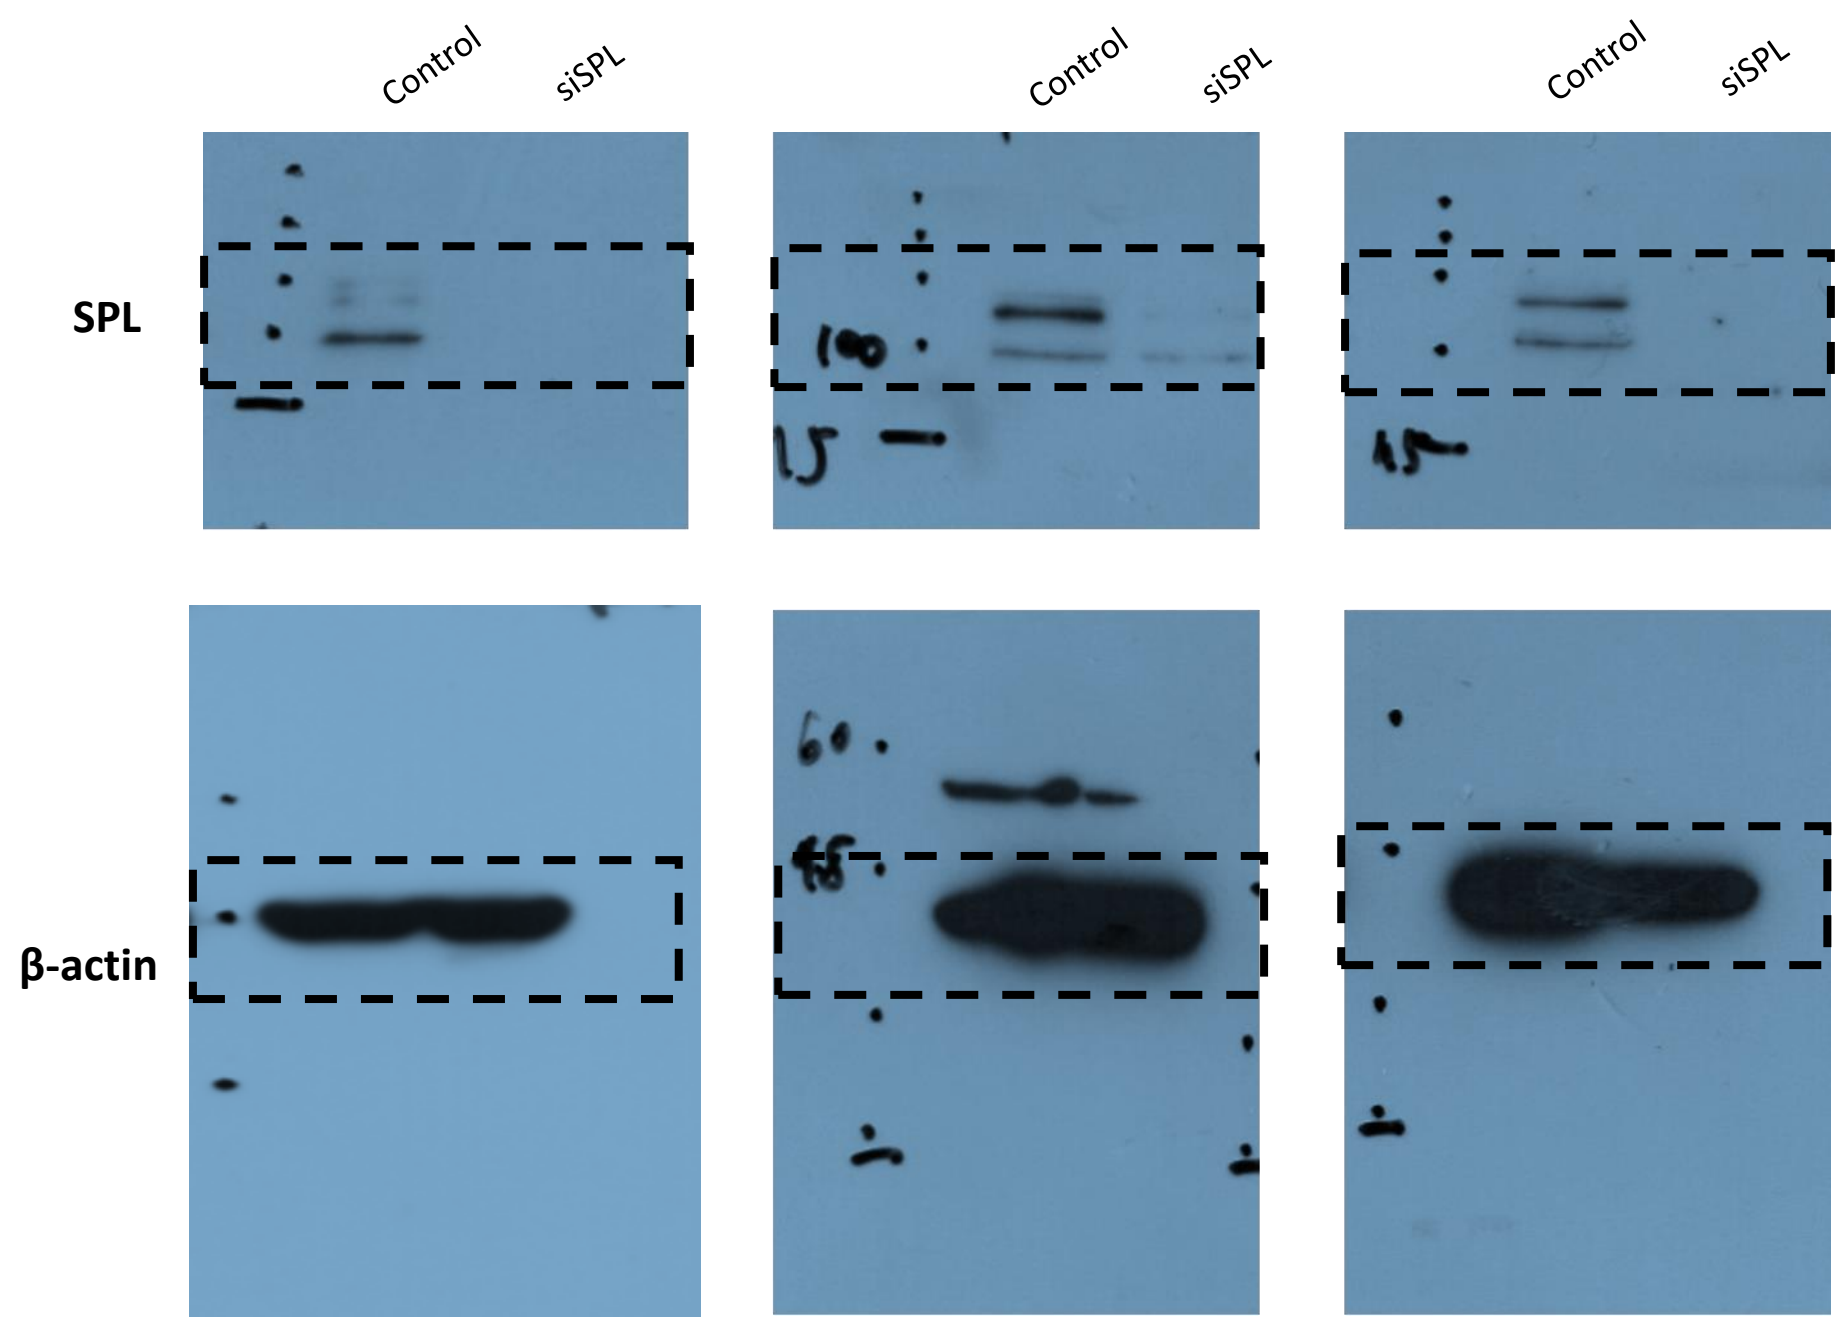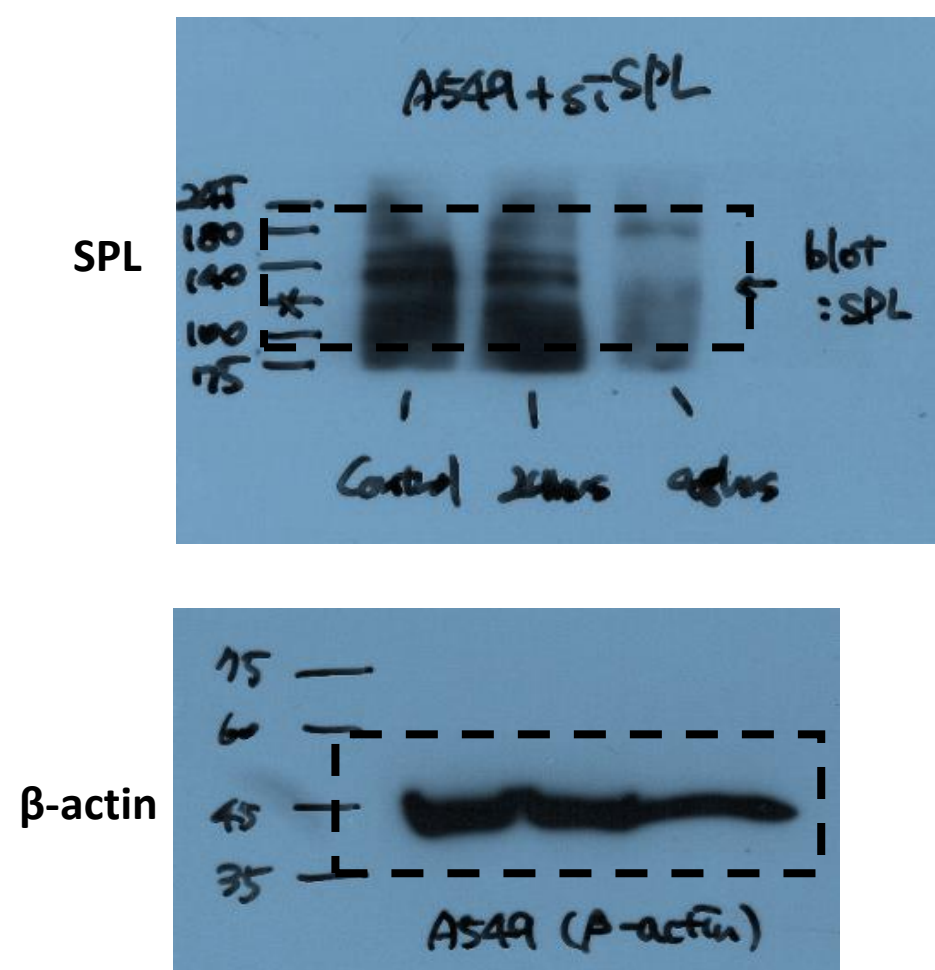

**Figure 1. (C)** Knockdown efficiency of SPL in A549 cells. The protein expression of SPL and  $\beta$ -actin with and without SiSPL. The  $\beta$ -actin antibody was used as a loading control.

Figure 2. Hwang et al.

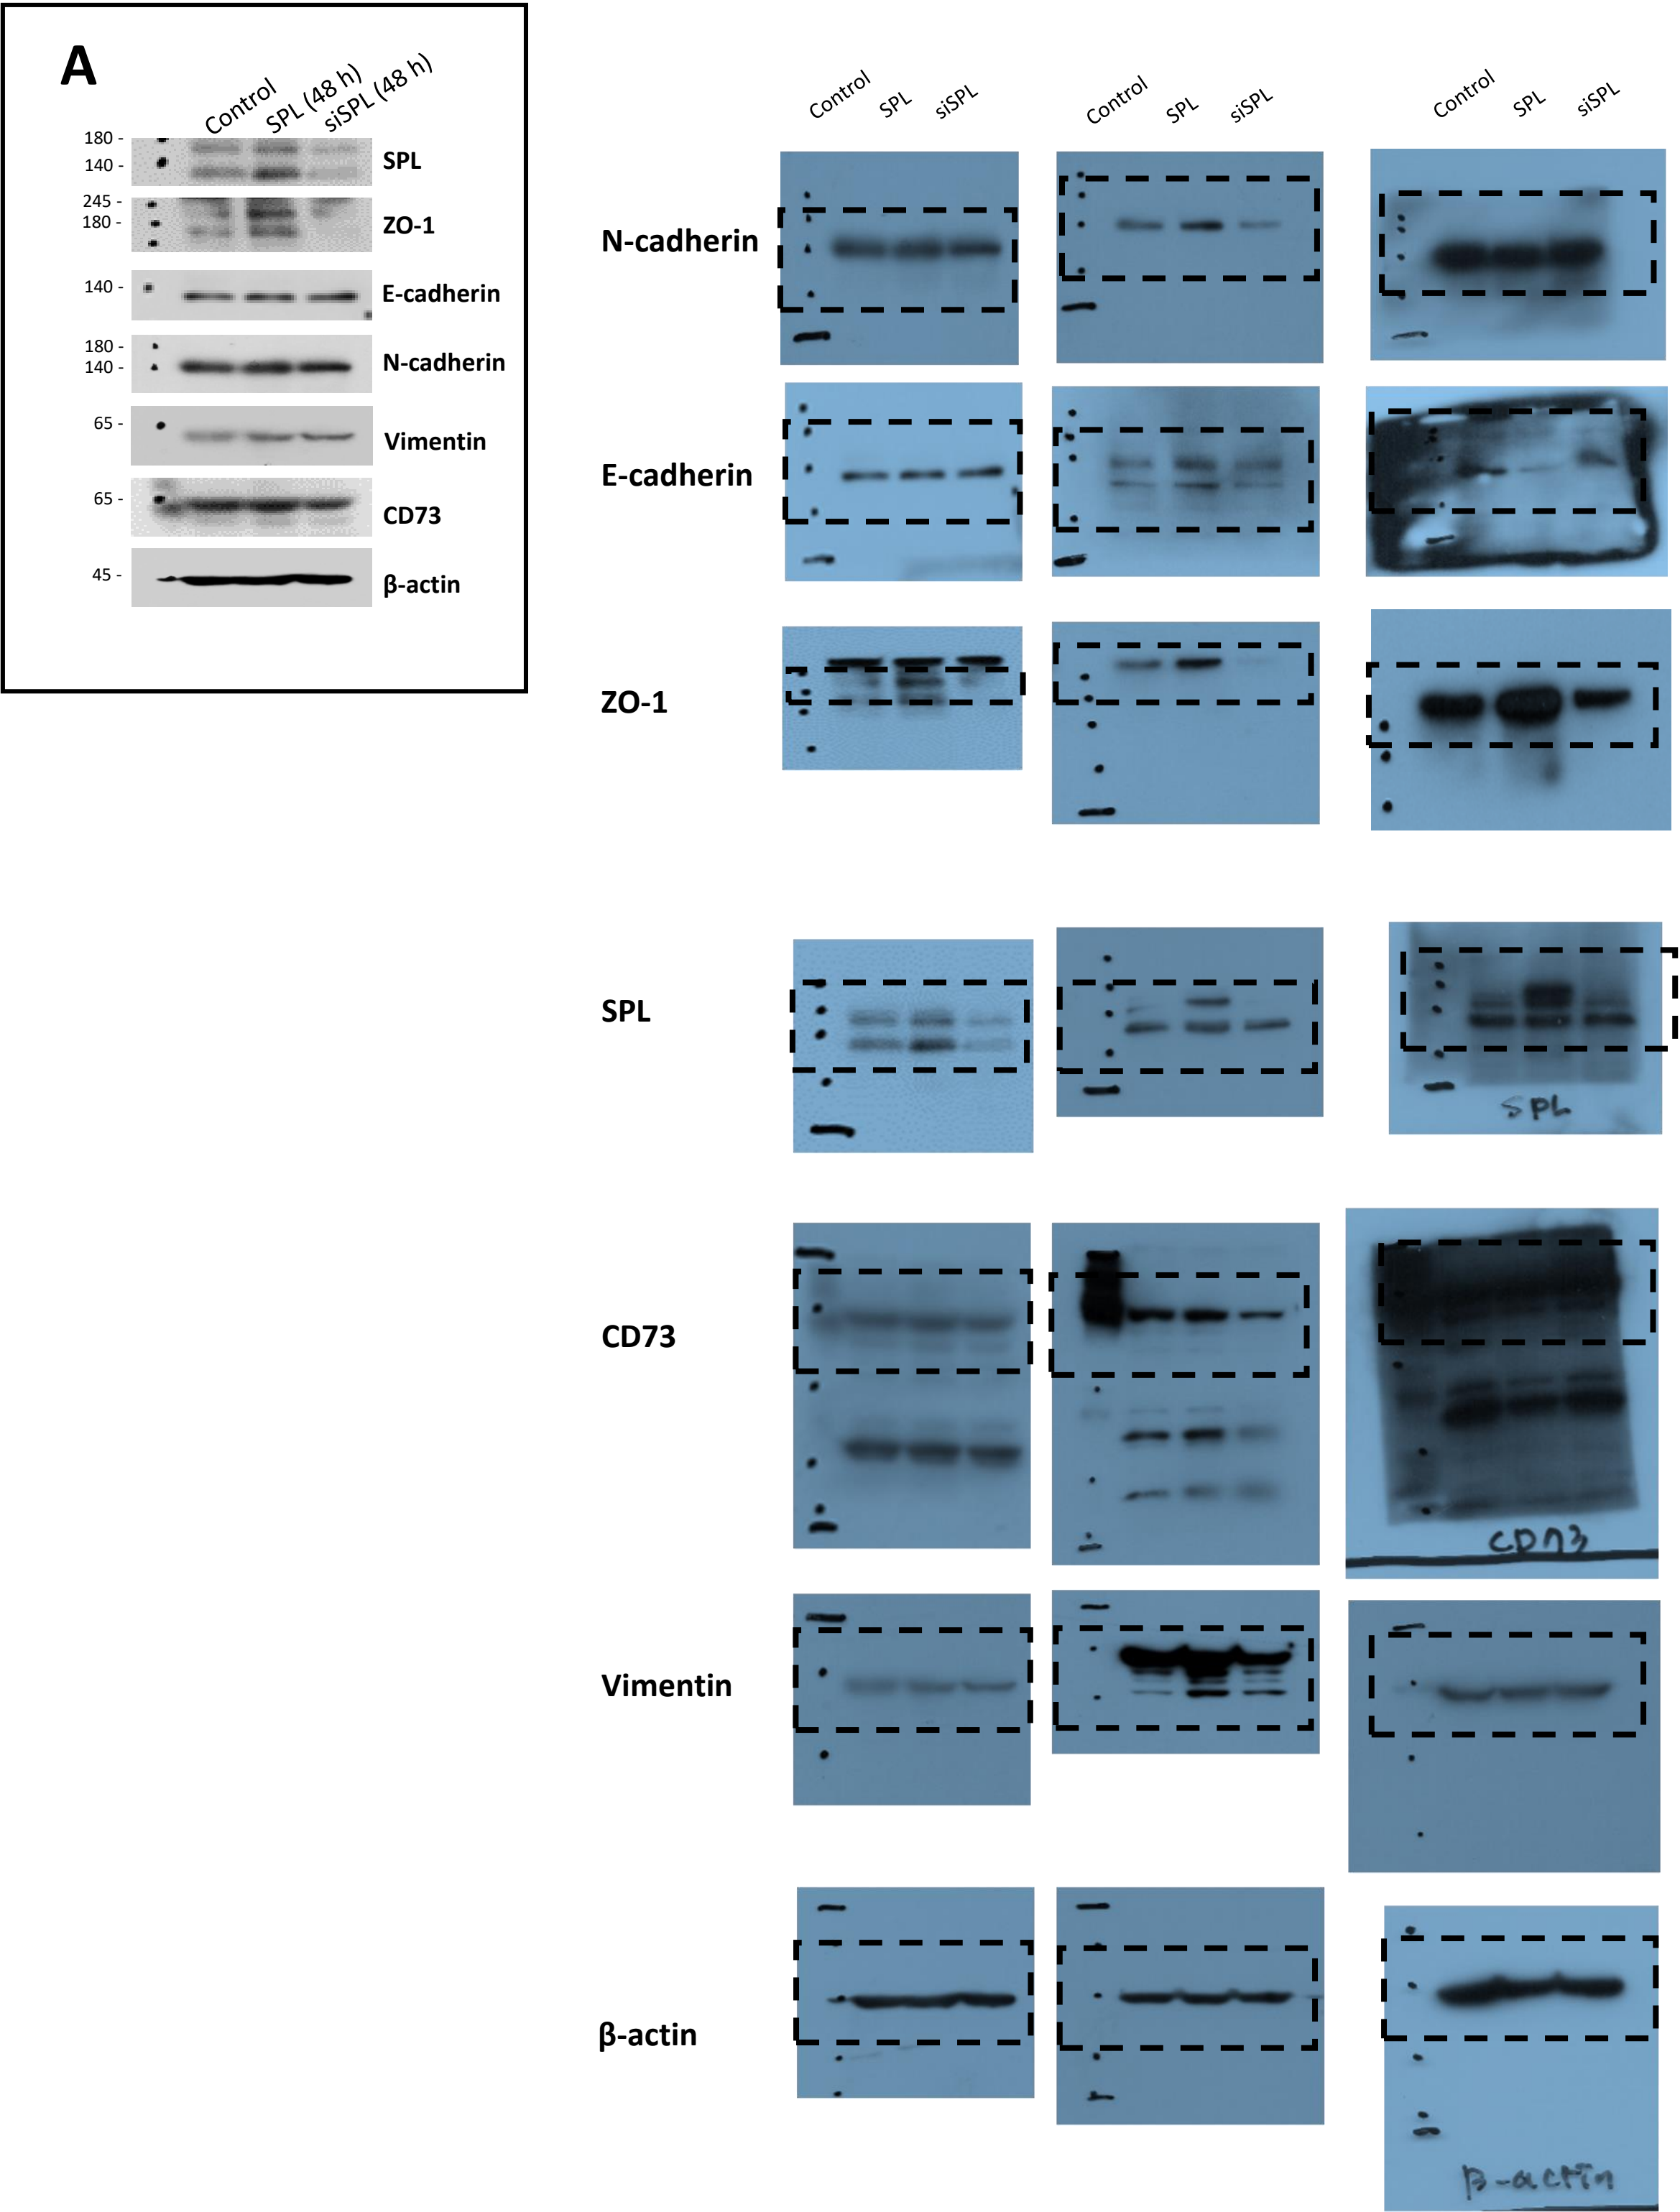

**Figure 2. (A)** Protein expression of EMT markers in A549 cells in the presence of SiRNA-SPL (SiSPL).  $\beta$ -actin were used as loading controls.

Figure 4. Hwang et al.

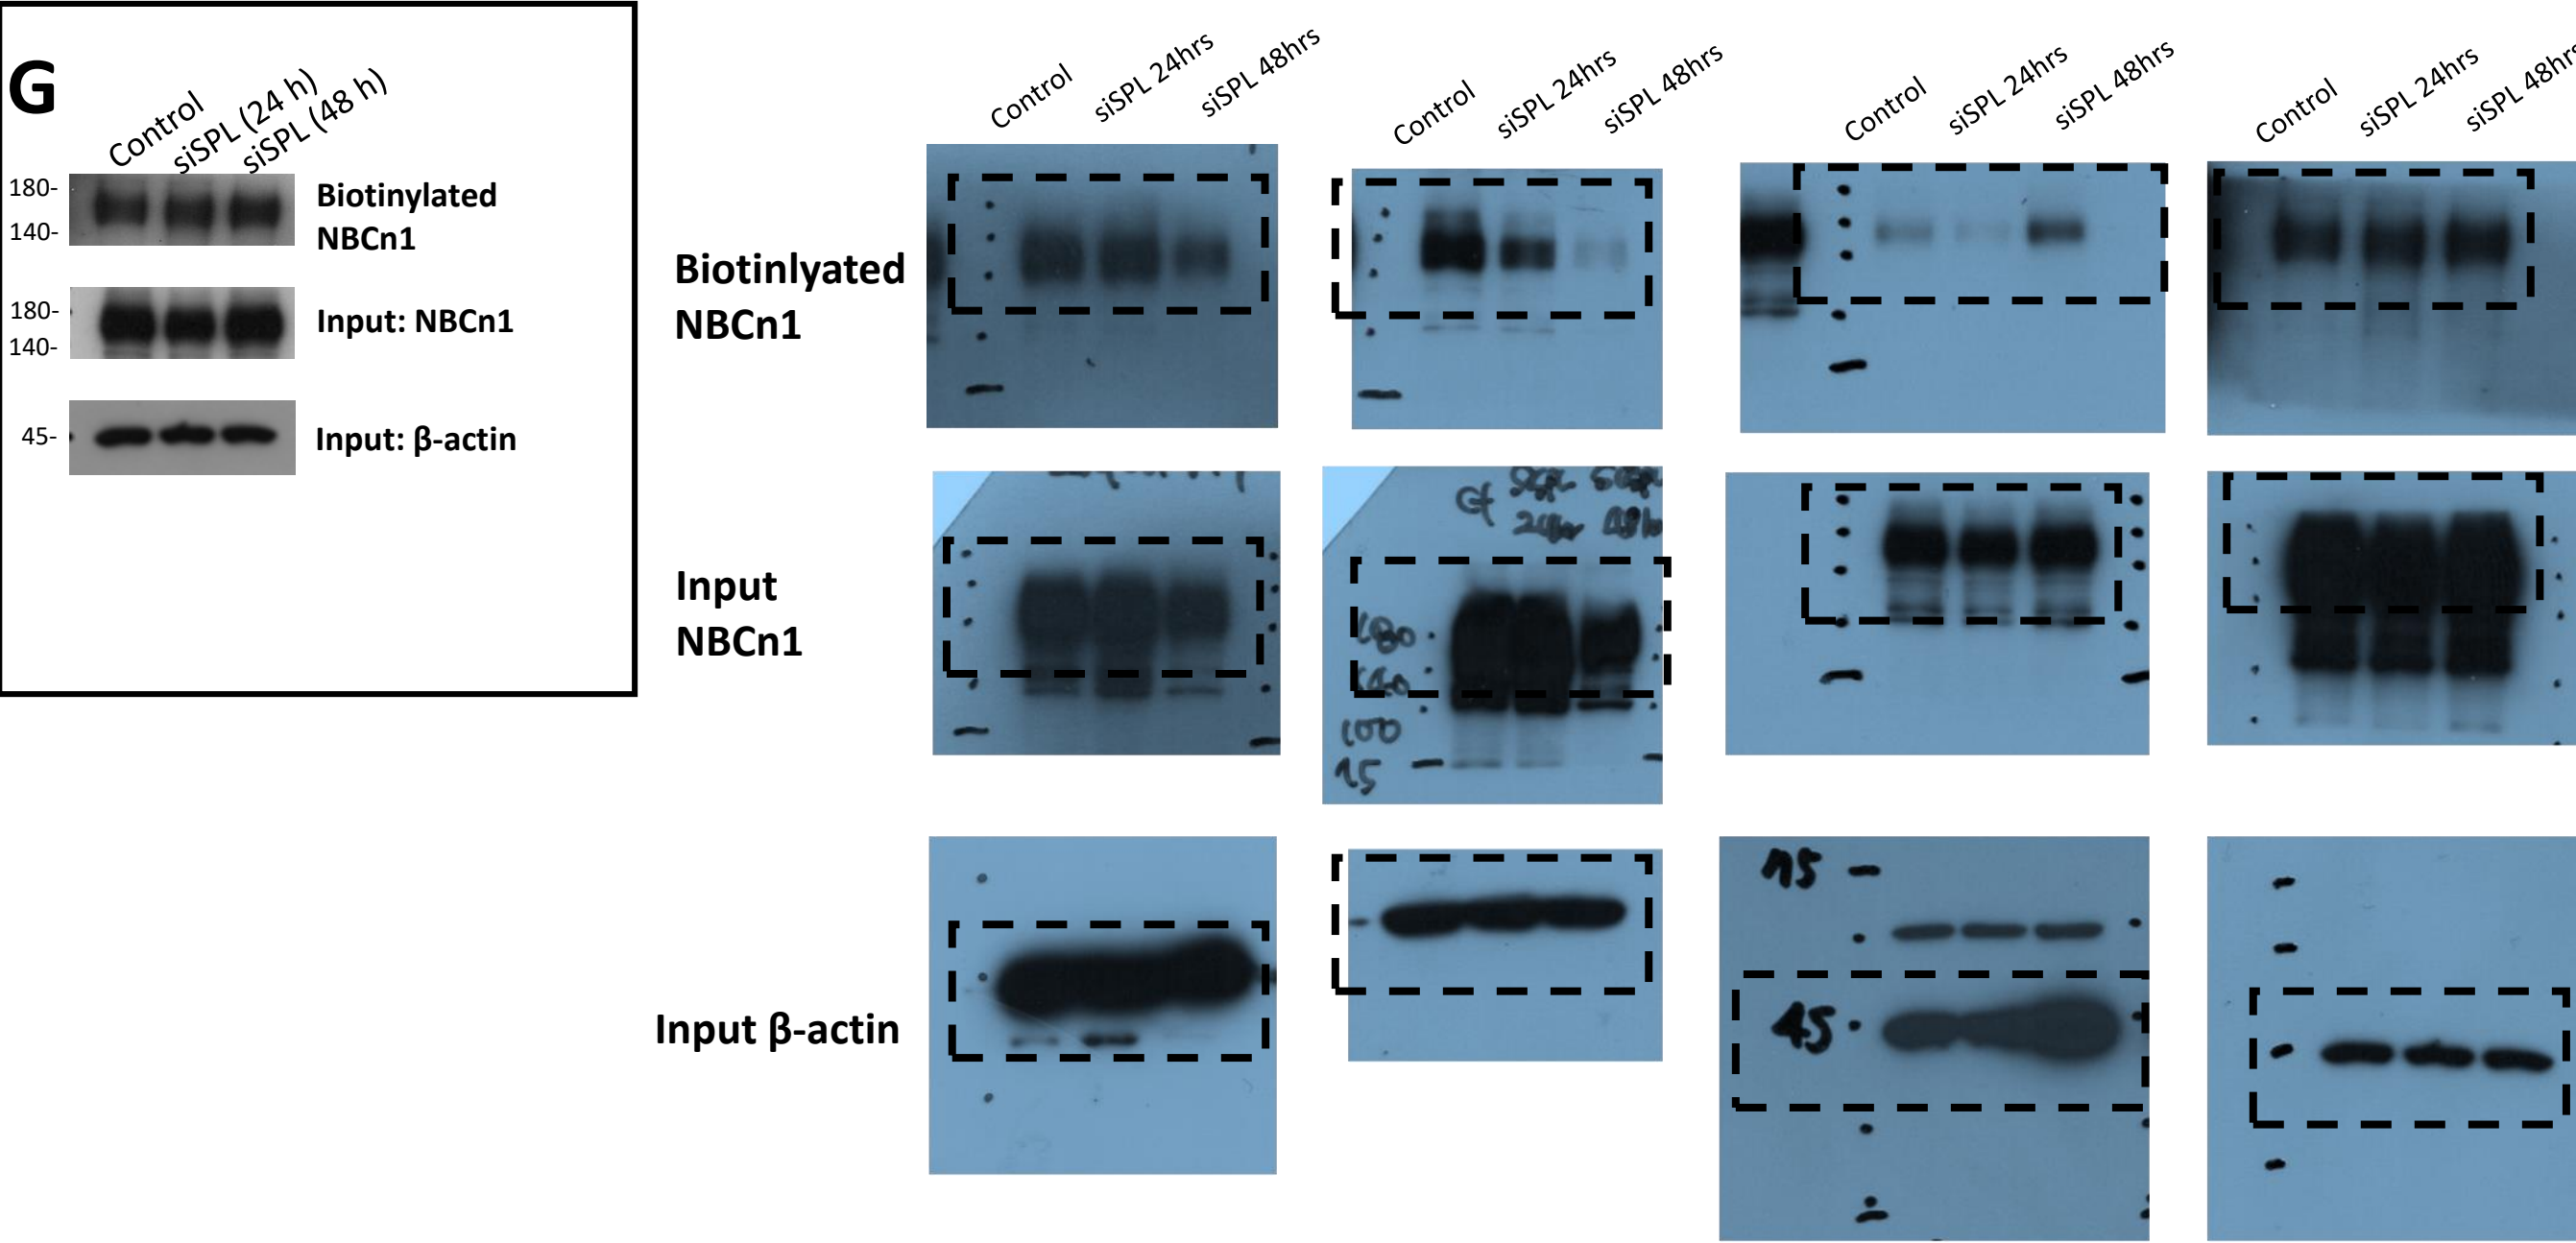

**Figure 4. (G)** Surface expression of NBCn1 in the presence of siSPL in A549 cells. Input  $\beta$ -actin, input NBCn1, and input SPL blots were used as loading controls.



Figure 6. Hwang et al.

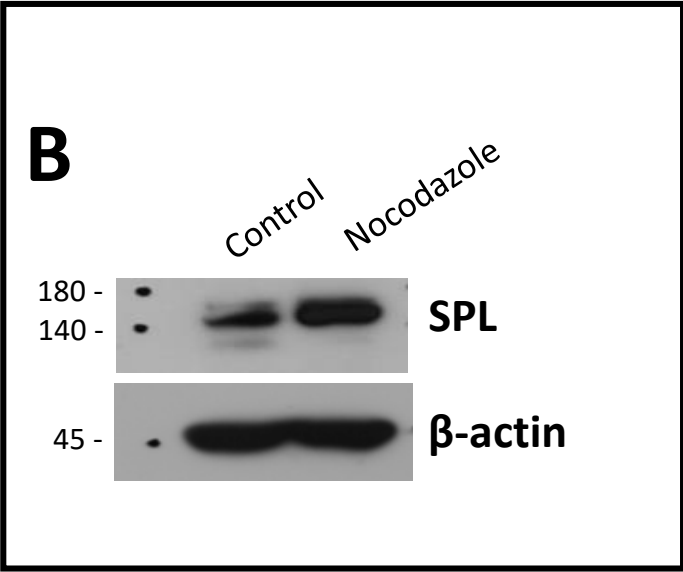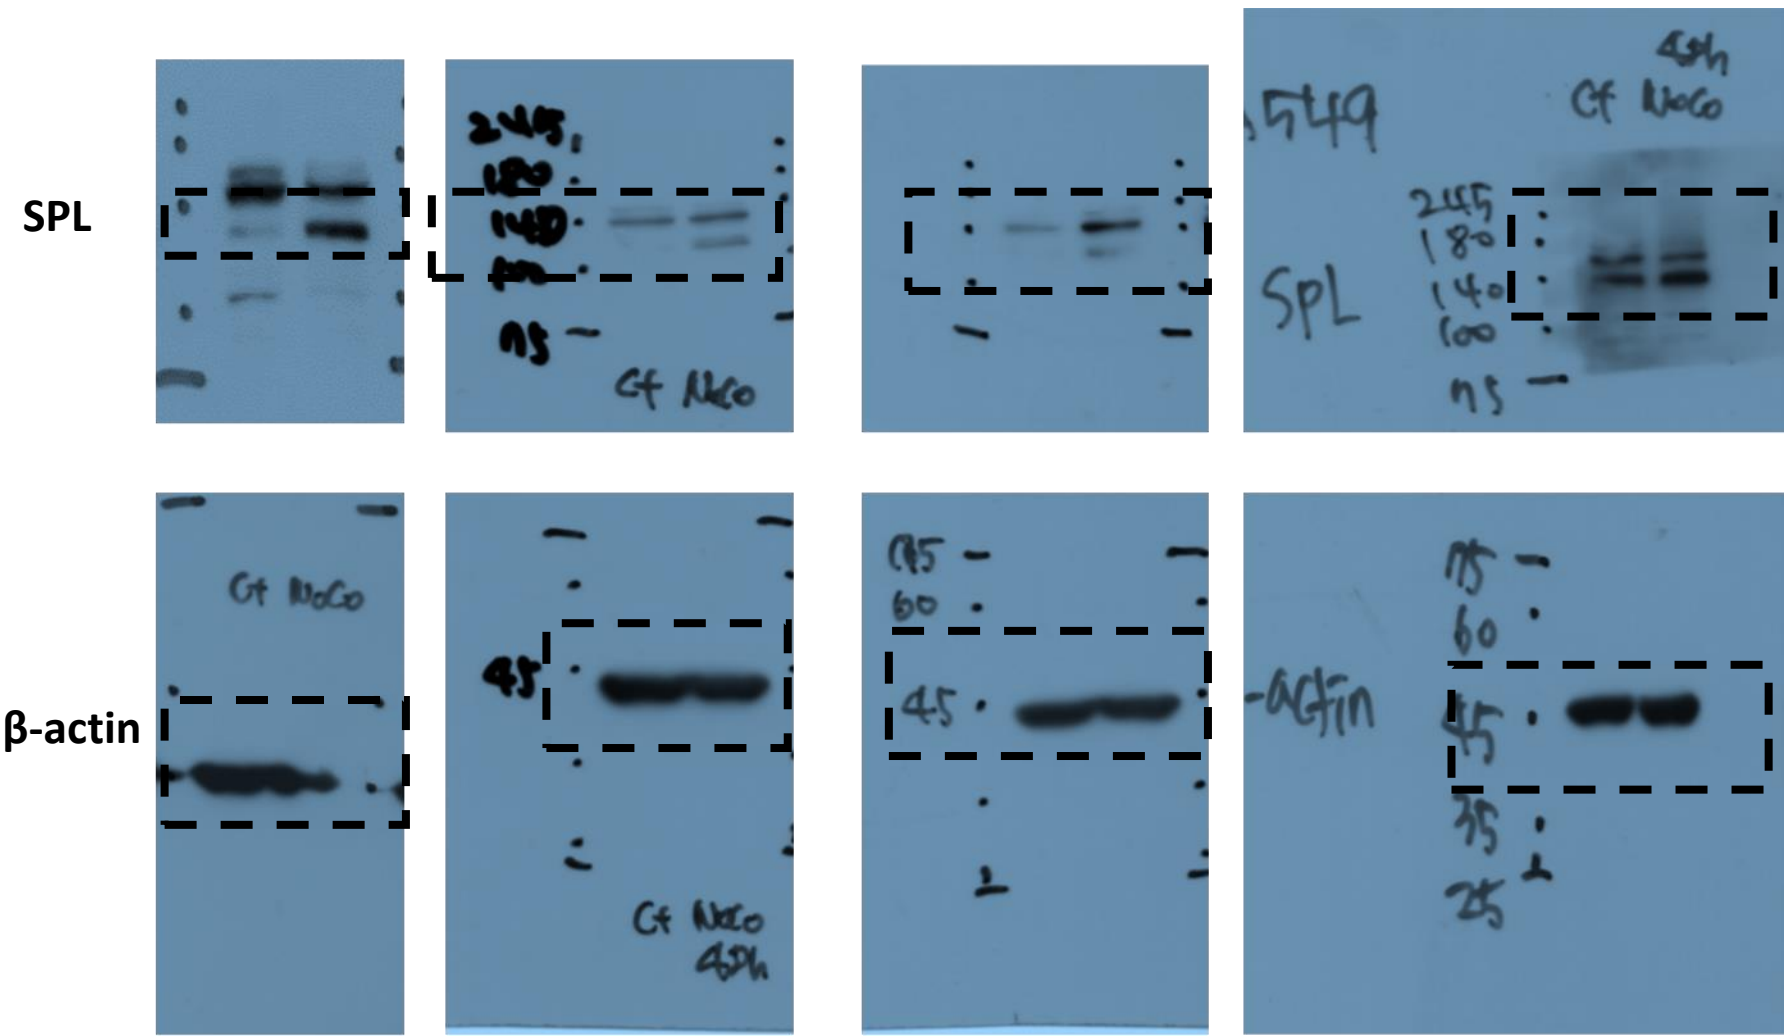

**Figure 6. (B)** Protein expression of SPL in A549 cells in the presence of 100  $\mu$ M Nocodazole in 48 hr.  $\beta$ -actin were used as loading controls
